# Supplementary material for: Model Evaluation of the Microbial Metabolic Processes in a Hydrogen-Based Membrane Biofilm Reactor for Simultaneous Bromate and Nitrate Reduction
Source: MDPI journal article supplement (doi:10.3390/membranes12080774), 2022-08-11
Supplement: s1 [file s1]

# Model Evaluation of the Microbial Metabolic Processes in a Hydrogen-Based Membrane Biofilm Reactor for Simultaneous Bromate and Nitrate Reduction

Minmin Jiang <sup>1,2</sup>, Yuanyuan Zhang <sup>2</sup>, Jie Zhang <sup>2,3,4</sup>, Xingru Dai <sup>2</sup>, Haixiang Li <sup>1,\*</sup>, Xuehong Zhang <sup>1,2</sup>, Zhichao Wu <sup>4</sup> and Junjian Zheng <sup>2,4,\*</sup>

<sup>1</sup> Guangxi Key Laboratory of Environmental Pollution Control Theory and Technology, Guilin University of Technology, 319 Yanshan Street, Guilin 541006, China; jiangminmin1015@163.com (M.J.); zhangxuehong@x263.net (X.Z.)

<sup>2</sup> College of Life and Environmental Science, Guilin University of Electronic Technology, 1 Jinji Road, Guilin 541004, China; zhangyuanyuan0226@hotmail.com (Y.Z.); jieemma2016@foxmail.com (J.Z.); xingrudai@163.com (X.D.)

<sup>3</sup> School of Chemistry and Materials Engineering, Huizhou University, 46 Yanda Road, Huizhou 516007, China

<sup>4</sup> State Key Laboratory of Pollution Control and Resource Reuse, School of Environmental Science and Engineering, Tongji University, 1239 Siping Road, Shanghai 200092, China; wuzhichao@tongji.edu.cn

\* Correspondence: 2011042@glut.edu.cn (H.L.); zhengjunjianglut@163.com (J.Z.)

**Table S1.** Short-term operational conditions of influencing factor experiment of the H<sub>2</sub>-MBfR.

| Short-term series                   | H <sub>2</sub> pressure (MPa) | Influent NO <sub>3</sub> <sup>-</sup> (mg/L) | CO <sub>2</sub> pressure (MPa) | Other conditions                                                                                  |
|-------------------------------------|-------------------------------|----------------------------------------------|--------------------------------|---------------------------------------------------------------------------------------------------|
| H <sub>2</sub> series               | 0.01-0.08                     | 10                                           | 0.012                          | Influent flowrate=2.0mL/min                                                                       |
| NO <sub>3</sub> <sup>-</sup> series | 0.04                          | 1-20                                         | 0.012                          | HRT=4.7                                                                                           |
| CO <sub>2</sub> series              | 0.04                          | 10                                           | 0.004-0.036                    | Influent BrO <sub>3</sub> <sup>-</sup> =1.0mg/L<br>Influent NO <sub>3</sub> <sup>-</sup> =10mgN/L |

**Table S2.** Start-up and long-term operational conditions of the H<sub>2</sub>-MBfR.

| Stages | Periods (days) | H <sub>2</sub> pressure (MPa) | CO <sub>2</sub> pressure (MPa) | Influent NO <sub>3</sub> <sup>-</sup> (mgN/L) | Influent BrO <sub>3</sub> <sup>-</sup> (mg/L) | Influent flowrate (mL/min) | HRT (h) |
|--------|----------------|-------------------------------|--------------------------------|-----------------------------------------------|-----------------------------------------------|----------------------------|---------|
| Stage1 | 0~40           | 0.04                          | 0.012                          | 10                                            | 0                                             | 1.6/2.0                    | 5.8/4.7 |
| Stage2 | 41~60          | 0.04                          | 0.012                          | 10                                            | 0                                             | 2.0                        | 4.7     |
| Stage3 | 61~80          | 0.04                          | 0.012                          | 10                                            | 0.1                                           | 2.0                        | 4.7     |
| Stage4 | 81~100         | 0.04                          | 0.012                          | 10                                            | 0.5                                           | 2.0                        | 4.7     |
| Stage5 | 101~140        | 0.04                          | 0.012                          | 10                                            | 1.0                                           | 2.0                        | 4.7     |

**Table S3.** Stoichiometric and kinetic parameters of BRB related metabolic process for the developed model.

| Parameter     | Definition                                                               | Value | Unit | Source                    |
|---------------|--------------------------------------------------------------------------|-------|------|---------------------------|
| $f_{s,BRB}^0$ | Fraction of electrons for cell synthesis reaction on BRB                 | 0.591 | -    | Theoretically calculated* |
| $f_{e,BRB}^0$ | Fraction of electrons for energy providing reaction on BRB               | 0.409 | -    | Theoretically calculated* |
| $\mu_{BRB}$   | Maximum specific growth rate of BRB                                      | 0.85  | 1/d  | Recalibrated              |
| $K_{BrO_3}$   | Half maximum rate concentration of BrO <sub>3</sub> <sup>-</sup> for BRB | 0.014 | mg/L | Recalibrated              |

**Table S4.** Experiments operational parameters for the model development.

| Parameters                                           | Symbol      | Value                | Unit           |
|------------------------------------------------------|-------------|----------------------|----------------|
| Total reactor volume                                 | $V$         | $5.6 \cdot 10^{-4}$  | m <sup>3</sup> |
| Membrane area                                        | $A$         | $6.33 \cdot 10^{-2}$ | m <sup>2</sup> |
| Influent velocity                                    | $Q_{in}$    | 2                    | mL/min         |
| Influent BrO <sub>3</sub> <sup>-</sup> concentration | $S_{BrO_3}$ | 0.1-1.0              | mg/L           |

|                                                     |            |             |       |
|-----------------------------------------------------|------------|-------------|-------|
| H <sub>2</sub> pressure                             | $P_{H_2}$  | 0.01-0.08   | MPa   |
| Influent NO <sub>3</sub> <sup>-</sup> concentration | $S_{NO_3}$ | 1-20        | mgN/L |
| CO <sub>2</sub> pressure                            | $P_{CO_2}$ | 0.004-0.036 | MPa   |

**Table S5.** Other pertinent input parameters for model development.

| Symbol                           | Description                                                                                 | Value                  | Unit                                | Source               |
|----------------------------------|---------------------------------------------------------------------------------------------|------------------------|-------------------------------------|----------------------|
| <i>Stoichiometric parameters</i> |                                                                                             |                        |                                     |                      |
| $f_{e,DNB}^0$                    | Portion of electrons for energy providing reaction of H <sub>2</sub> -based denitrification | 0.462                  | -                                   | (Jiang et al., 2020) |
| $f_{s,DNB}^0$                    | Portion of electrons for biomass synthesis of DNB                                           | 0.538                  | -                                   | (Jiang et al., 2020) |
| $Y_{HB}$                         | Yield for HB growing on SMP                                                                 | 0.67                   | mol COD/mol COD                     | (Henze et al., 2008) |
| $k_1$                            | Fraction of electrons going to biomass production                                           | 0.77                   | -                                   | (Tang et al., 2012)  |
| $k_2$                            | Fraction of electrons going to SMP formation                                                | 0.05                   | -                                   | (Tang et al., 2012)  |
| $k_3$                            | Fraction of electrons going to EPS formation                                                | 0.18                   | -                                   | (Tang et al., 2012)  |
| $f_d$                            | Fraction of biodegradable biomass                                                           | 0.8                    | -                                   | (Tang et al., 2012)  |
| <i>Kinetic parameters</i>        |                                                                                             |                        |                                     |                      |
| $\mu_{DNB}$                      | Maximum specific growth rate of DNB                                                         | 0.57                   | 1/d                                 | Recalibrated         |
| $\mu_{HB}$                       | Maximum specific growth rate of HB                                                          | 4                      | 1/d                                 | (Jiang et al., 2020) |
| $K_{H_2}^{DNB}$                  | Half maximum rate concentration of H <sub>2</sub> for DNB                                   | 0.001                  | mol H <sub>2</sub> /m <sup>3</sup>  | (Tang et al., 2012)  |
| $K_{NO_3}^{DNB}$                 | Half maximum rate concentration of NO <sub>3</sub> <sup>-</sup> for DNB                     | 0.0143                 | mol N/m <sup>3</sup>                | (Tang et al., 2012)  |
| $K_{CO_2}^{DNB}$                 | Half maximum rate concentration of CO <sub>2</sub> for DNB                                  | 0.0001                 | mol CO <sub>2</sub> /m <sup>3</sup> | (Jiang et al., 2020) |
| $K_{H_2}^{BRB}$                  | Half maximum rate concentration of H <sub>2</sub> for BRB                                   | 0.001                  | mol H <sub>2</sub> /m <sup>3</sup>  | (Jiang et al., 2020) |
| $K_{NO_3}^{BRB}$                 | Half maximum rate concentration of NO <sub>3</sub> <sup>-</sup> for BRB                     | 0.0143                 | mol N/m <sup>3</sup>                | (Jiang et al., 2020) |
| $K_{CO_2}^{BRB}$                 | Half maximum rate concentration of CO <sub>2</sub> for BRB                                  | 0.0001                 | mol CO <sub>2</sub> /m <sup>3</sup> | (Jiang et al., 2020) |
| $K_{NO_3}^{HB}$                  | Half maximum rate concentration of NO <sub>3</sub> <sup>-</sup> for HB                      | 0.0143                 | mol N/m <sup>3</sup>                | (Tang et al., 2012)  |
| $K_{SMP}^{HB}$                   | Half maximum rate concentration of SMP for HB                                               | 0.156                  | mol COD/m <sup>3</sup>              | (Chen et al., 2017)  |
| $b_{DNB}$                        | Specific decay rate of DNB                                                                  | 0.05                   | 1/d                                 | (Jiang et al., 2020) |
| $b_{BRB}$                        | Specific decay rate of BRB                                                                  | 0.05                   | 1/d                                 | (Jiang et al., 2020) |
| $b_{HB}$                         | Specific decay rate of HB                                                                   | 0.1                    | 1/d                                 | (Jiang et al., 2020) |
| $k_{hyd}$                        | Hydrolysis rate of EPS                                                                      | 0.22                   | 1/d                                 | (Tang et al., 2012)  |
| <i>Physical parameters</i>       |                                                                                             |                        |                                     |                      |
| $D_{H_2}$                        | Diffusion coefficient of H <sub>2</sub> in water                                            | 4.415·10 <sup>-4</sup> | m <sup>2</sup> /d                   | (Lide, 2012)         |
| $D_{NO_3}$                       | Diffusion coefficient of NO <sub>3</sub> <sup>-</sup> in water                              | 1.643·10 <sup>-4</sup> | m <sup>2</sup> /d                   | (Lide, 2012)         |
| $D_{BrO_3}$                      | Diffusion coefficient of BrO <sub>3</sub> <sup>-</sup> in water                             | 1.281·10 <sup>-4</sup> | m <sup>2</sup> /d                   | (Lide, 2012)         |
| $D_{CO_2}$                       | Diffusion coefficient of CO <sub>2</sub> in water                                           | 1.650·10 <sup>-4</sup> | m <sup>2</sup> /d                   | (Lide, 2012)         |
| $D_{SMP}$                        | Diffusion coefficient of SMP in water                                                       | 8.64·10 <sup>-5</sup>  | m <sup>2</sup> /d                   | (Lide, 2012)         |

|                  |                                          |       |     |                      |
|------------------|------------------------------------------|-------|-----|----------------------|
| $f_{\text{dif}}$ | Diffusion in biofilm/in water            | 0.75  | -   | (Jiang et al., 2020) |
| $H_{\text{H}_2}$ | Henry coefficient of $\text{H}_2$        | 0.019 | -   | (Jiang et al., 2020) |
| $K_m$            | $\text{H}_2$ transfer coefficient of HFM | 0.189 | m/d | Recalibrated         |

**Section S1.** Calculation of the stoichiometric coefficients for BRB metabolic process (method (Henze et al., 2008; Jiang et al., 2020)).

The stoichiometric coefficient for BRB metabolic process was theoretically calculated based on bioenergetics. The calculation procedure consists of the following 4 steps.

*A. Energy providing reaction (catabolism)*

The reaction and energy available from the autotrophic growth with  $\text{H}_2$  as electron donor and  $\text{BrO}_3^-$  as electron acceptor is:

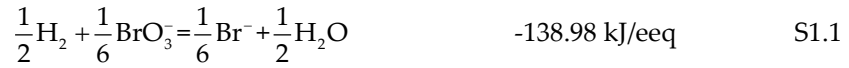

$$\Delta G_{\text{cata}} = K\Delta G_{\text{R}} = 0.60 \times (-138.98) = -83.39 \text{ kJ/eeq} \quad \text{S1.2}$$

where:  $\Delta G_{\text{cata}}$  is the Gibbs energy available for catabolism from 1 eeq of electron donor (kJ/eeq),  $K$  is the fraction of energy transfer captured (typically 0.60),  $\Delta G_{\text{R}}$  is the Gibbs energy released from 1 eeq of electron donor (kJ/eeq),  $\Delta G_{\text{R}} = -138.98 \text{ kJ/eeq}$  according to S1.1.

*B. Energy needed for cell synthesis (anabolism)*

Referring to the references (Henze et al., 2008; Jiang et al., 2020), the energy needed to synthesize biomass from  $\text{H}_2$  as electron donor and  $\text{NO}_3^-$  as nitrogen source was that  $\Delta G_{\text{ana}} = 57.702 \text{ kJ/eeq}$ .

*C. Determining  $f_e^0$  (energy fraction) and  $f_s^0$  (cell synthesis fraction)*

$$f_s^0 = \frac{1}{1 + \frac{f_e^0}{f_s^0}} = \frac{1}{1 + \frac{\Delta G_{\text{ana}}}{-\Delta G_{\text{cata}}}} = \frac{1}{1 + \frac{57.702}{83.39}} = 0.591 \quad \text{S1.3}$$

$$f_e^0 = 1 - f_s^0 = 1 - 0.591 = 0.409 \quad \text{S1.4}$$

*D. Solve for the stoichiometric coefficients for all the components with BRB autotrophic growth on  $\text{H}_2$*

$$(\text{ED reaction}) + (\text{EA reaction}) \times f_e^0 + (\text{Synthesis reaction}) \times f_s^0 \quad \text{S1.5}$$

$$\frac{1}{2}\text{H}_2 + \frac{f_s^0}{28}\text{NO}_3^- + \frac{f_e^0}{6}\text{BrO}_3^- + \left(f_e^0 + \frac{29f_s^0}{28} - 1\right)\text{H}^+ + \frac{5f_s^0}{28}\text{CO}_2 = \frac{f_e^0}{6}\text{Br}^- + \frac{f_s^0}{28}\text{C}_5\text{H}_7\text{O}_2\text{N} + \left(\frac{f_e^0}{2} + \frac{11f_s^0}{28}\right)\text{H}_2\text{O} \quad \text{S1.6}$$

Substitute the values of  $f_e^0$  and  $f_s^0$  into S1.6:

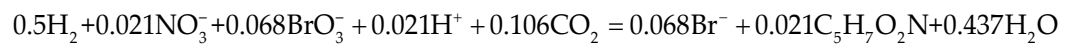

S1.7

## References

- Chen, X., Liu, Y., Peng, L., Ni, B.-J., 2017. Perchlorate, Nitrate, and Sulfate Reduction in Hydrogen-based Membrane Biofilm Reactor: Model-based Evaluation. *Chemical Engineering Journal* 316, 82-90. <https://doi.org/10.1016/j.cej.2017.01.084>.
- Henze, M., van Loosdrecht, M.C., Ekama, G.A., Brdjanovic, D., 2008. *Biological Wastewater Treatment*, IWA publishing, London, UK.
- Jiang, M., Zheng, J., Perez-Calleja, P., Picioreanu, C., Lin, H., Zhang, X., Zhang, Y., Li, H., Nerenberg, R., 2020. New Insight into CO<sub>2</sub>-mediated Denitrification Process in H<sub>2</sub>-based Membrane Biofilm Reactor: An Experimental and Modeling Study. *Water Research* 184, 116177. <https://doi.org/10.1016/j.watres.2020.116177>.
- Lide, D.R., 2012. *CRC handbook of chemistry and physics*, CRC Boca Raton, Florida, US.
- Tang, Y., Zhao, H., Marcus, A.K., Krajmalnik-Brown, R., Rittmann, B., E, 2012. A steady-state Biofilm Model for Simultaneous Reduction of Nitrate and Perchlorate, Part 1: Model Development and Numerical Solution. *Environmental Science & Technology* 46(3), 1598-1607. <https://doi.org/10.1021/es203129s>.
